# Supplementary material for: Facile fabrication of NH4CoPO4·H2O nano/microstructures and their primarily application as electrochemical supercapacitor
Source: Royal Society of Chemistry journal article supplement (doi:10.1039/c2nr31208e), 2012-01-01
Supplement: c2nr31208e.pdf [file c2nr31208e.pdf]

### Electronic Supplementary Information (ESI)

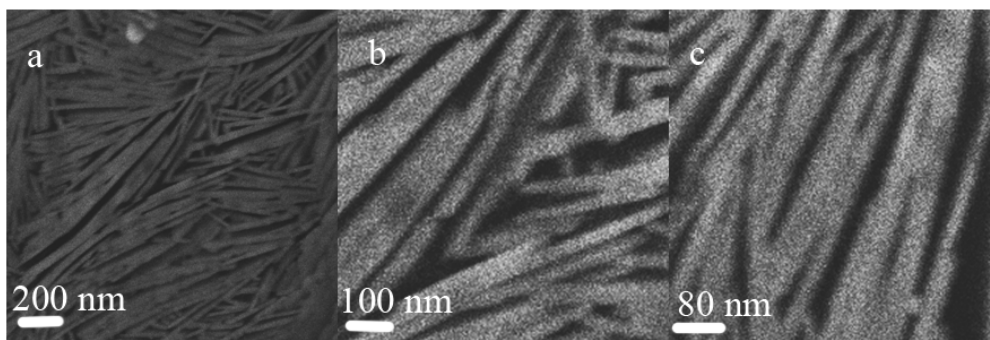

ESI Fig. 1 SEM images of M5 obtained under different magnifications.

ESI Table 1 a charge-transfer  $R_{ct}$  of M1-M5 was calculated by ZSimpWin software

| Sample | $R_{ct}/\text{ohm}$ |
|--------|---------------------|
| M1     | 7.8                 |
| M2     | 16.6                |
| M3     | 9.5                 |
| M4     | 18.3                |
| M5     | 5.6                 |
